# Supplementary material for: BASIS: High-performance bioinformatics platform for processing of large-scale mass spectrometry imaging data in chemically augmented histology
Source: PubMed Central journal article supplement (PMC5840264; doi:10.1038/s41598-018-22499-z), 2018-03-06
Supplement: 41598_2018_22499_MOESM1_ESM.pdf [file 41598_2018_22499_MOESM1_ESM.pdf]

## **BASIS: High-performance bioinformatics platform for processing of large-scale mass spectrometry imaging data in chemically augmented histology**

Kirill Veselkov<sup>1\*</sup>; Jonathan Sleeman<sup>2,3</sup>; Emmanuelle Claude<sup>4</sup>; Johannes PC Vissers<sup>4</sup>; Dieter Galea<sup>1</sup>; Anna Mroz<sup>1</sup>; Ivan Laponogov<sup>1</sup>; Mark Towers<sup>4</sup>; Robert Tonge<sup>4</sup>; Reza Mirnezami<sup>1</sup>; Zoltan Takats<sup>1</sup>; Jeremy K Nicholson<sup>1</sup>, James I Langridge<sup>4</sup>

<sup>1</sup>Computational and Systems Medicine, Department of Surgery and Cancer, Imperial College London, UK,

<sup>2</sup>University of Heidelberg, Medical Faculty Mannheim, Center for Biomedicine and Medical Technology, Mannheim, Germany; <sup>3</sup>KIT Karlsruhe, Institute of Toxicology and Genetics, Karlsruhe, Germany; <sup>4</sup>Waters Corporation, Wilmslow, UK. \*To whom correspondence should be addressed. Email: kirill.veselkov04@imperial.ac.uk

## SUPPLEMENTARY INFORMATION

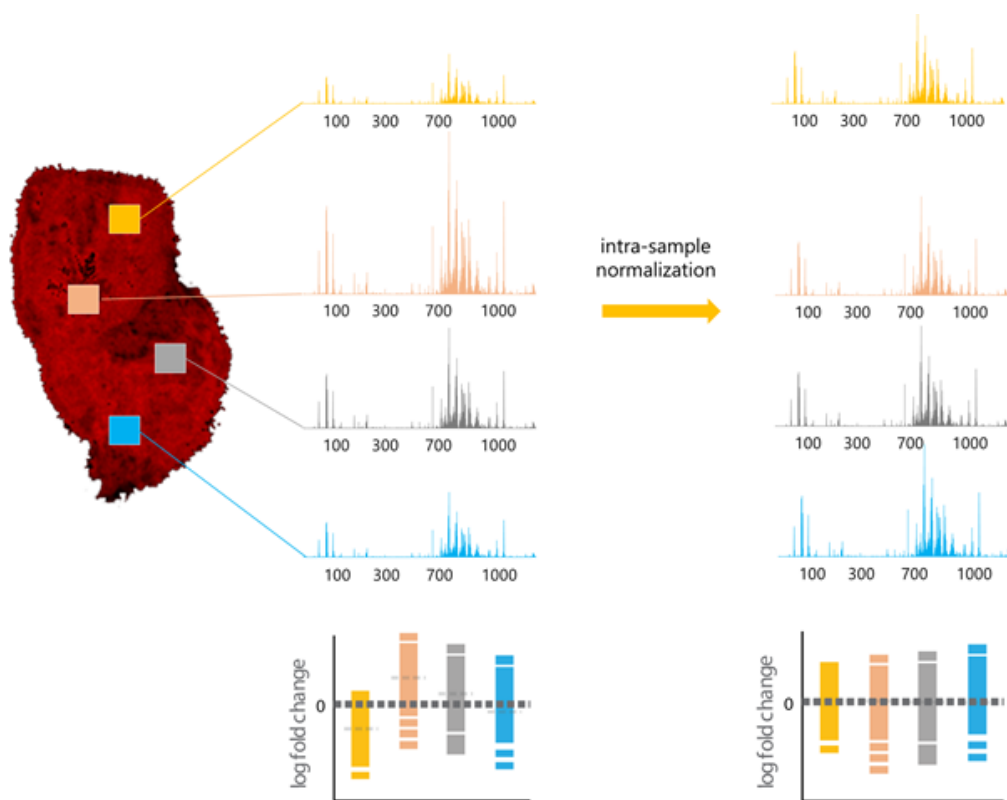

**Figure S1. Intra-sample normalization strategy.** Spectra with different median log fold changes are zero-centred in order to account for the difference in total ion intensities between spectra within the same sample (intra-sample normalization).

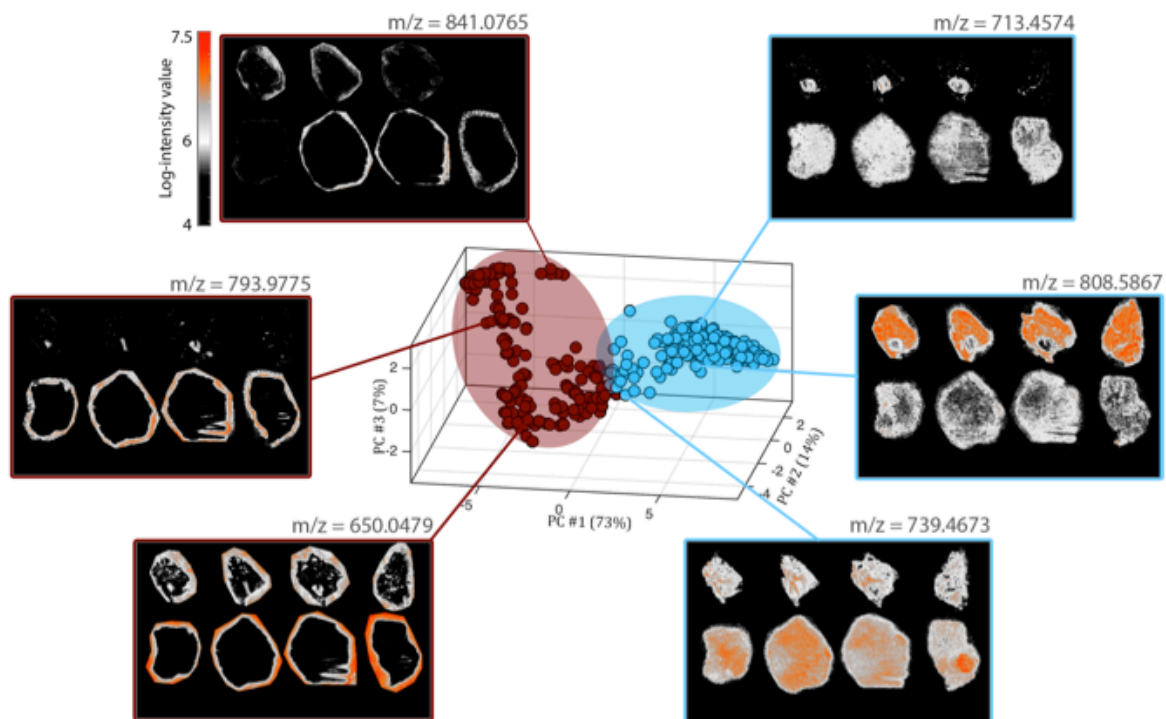

**Figure S2. Cluster-driven matrix/solvent removal strategy for large-scale MSI data.** The negative intensity correlation between tissue (matrix) and solvent is utilized to perform clustering and subsequent separation of tissue- and background-related signals. The differentiability of such clusters is also visualized by a PCA plot.
